# Supplementary material
Source: PubMed Central journal article supplement (PMC7081418)
Supplement: ao9b03875_si_001.pdf [file ao9b03875_si_001.pdf]

## **Supplementary Information**

**A new dual functional and reusable bimetallic  $Y_2ZnO_4$   
nanocatalyst for organic transformation under Microwave/Green  
approach**

Mithun Kumar Ghosh<sup>†</sup>, Kavita Jain<sup>‡</sup>, Siddique Khan<sup>‡</sup>, Kalpataru Das<sup>‡,\*</sup> and Tanmay Kumar  
Ghorai<sup>†,\*</sup>

Nanomaterials and Crystal Designing Laboratory, Department of Chemistry<sup>†</sup>  
Indira Gandhi National Tribal University, Amarkantak, M.P, India

Advanced Organic Synthesis Laboratory, Department of Chemistry<sup>‡</sup>  
Dr. Harisingh Gour Vishwavidyalaya (Central University), Sagar, M.P. India

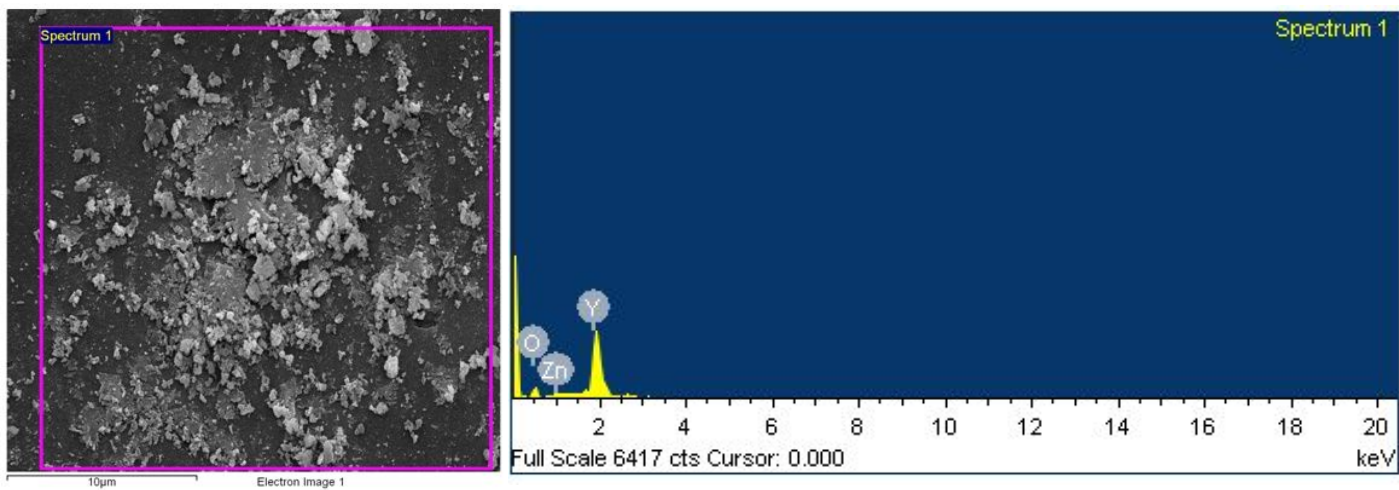

**Figure S1. Energy dispersive X-ray (EDX) spectrum of  $Y_2ZnO_4$**

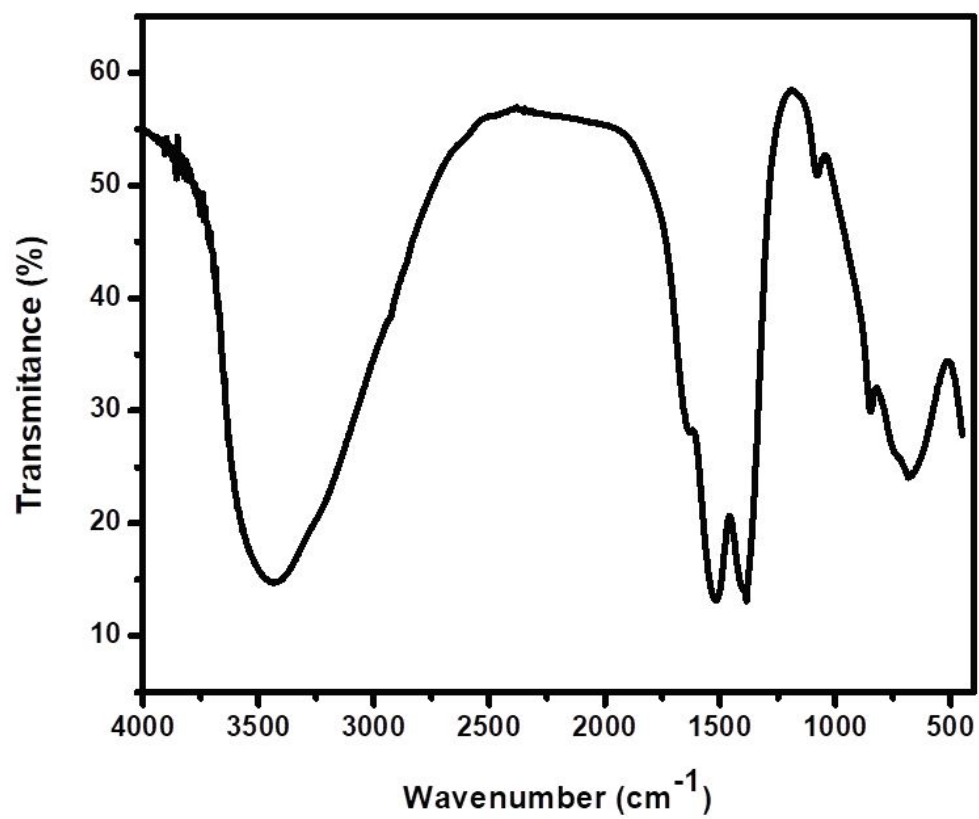

Figure S2. FT-IR spectra for  $Y_2ZnO_4$

## General information

All chemicals used in the experiments were obtained from commercial resource and used without further purification. The  $^1\text{H}$ NMR spectrum was recorded in 400 MHz FT NMR instrument using  $\text{CDCl}_3$  as Solvent. The yield of the products was calculated from  $^1\text{H}$ NMR of the crude reaction mixture using phenanthrene as a standard. All  $^1\text{H}$ NMR spectra shown below (S 3-11) were recorded in the presence of phenanthrene as a standard.  $^1\text{H}$ NMR peak of the products was assigned and confirmed by the comparison with literature data.<sup>1-5</sup>

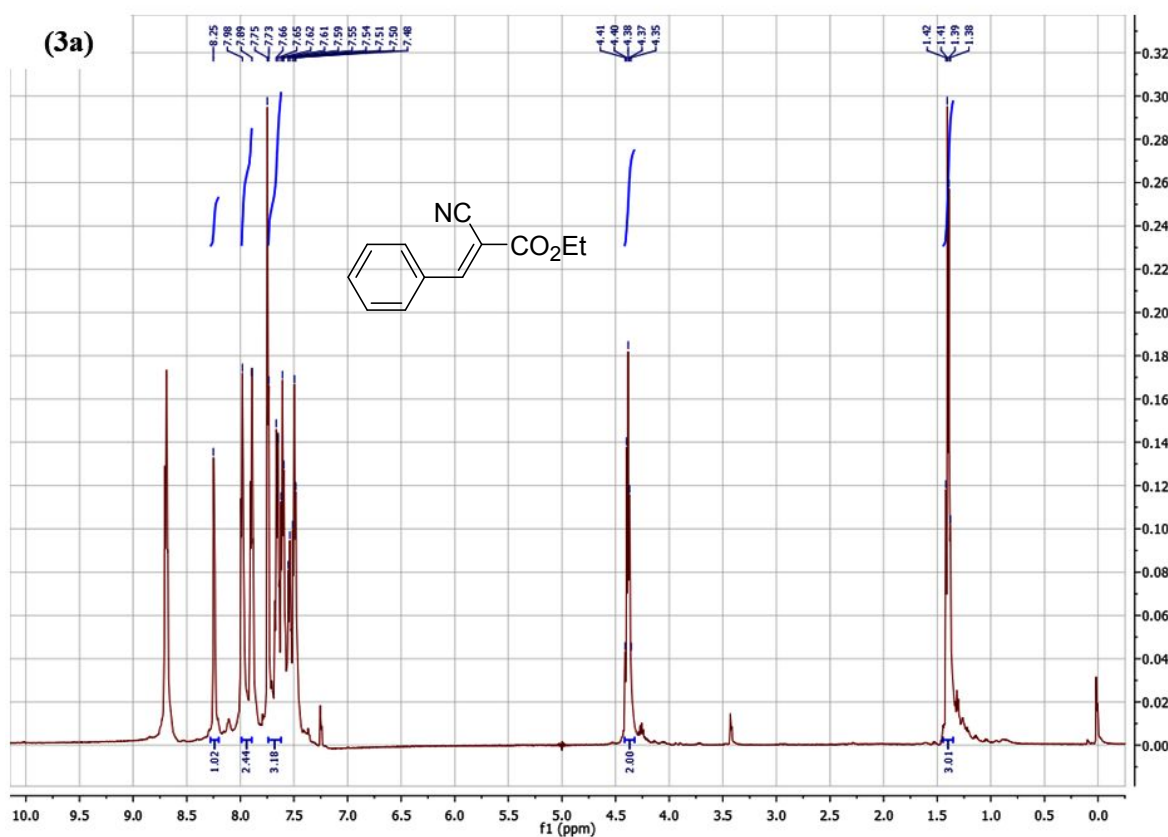

**Figure S3:  $^1\text{H}$ NMR spectrum of 2-Cyano-3-phenyl-acrylic acid ethyl ester (3a) with standard phenanthrene**

[2-Cyano-3-phenyl-acrylic acid ethyl ester (3a).<sup>1 40</sup>  $^1\text{H}$  NMR (400 MHz,  $\text{CDCl}_3$ )  $\delta$ : 8.2 (s, 1H), 7.94 (d,  $J = 7.2$  Hz, 2H), 7.75-7.50 (m, 3H), 4.40 (q,  $J = 7.2$  Hz, 2H), 1.41 (t,  $J = 7.1$  Hz, 3H). Yield 92% (The yield was calculated from  $^1\text{H}$ NMR using phenanthrene as a standard)]

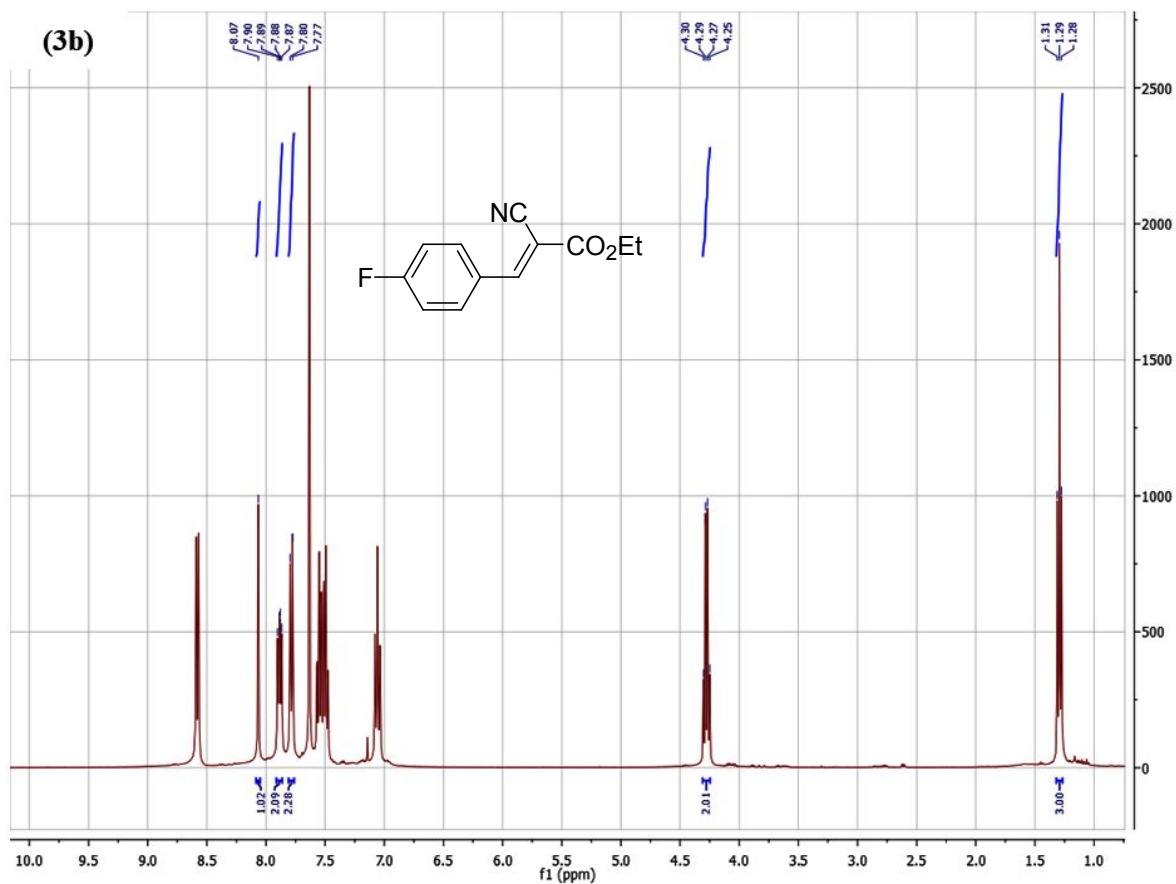

**Figure S4: <sup>1</sup>H NMR spectrum of 2-Cyano-3-(4-fluoro-phenyl)-acrylic acid ethyl ester (3b) with standard phenanthrene**

[2- Cyano-3-(4-fluoro-phenyl)-acrylic acid ethyl ester (3b).<sup>2</sup> <sup>1</sup>H NMR (400 MHz, CDCl<sub>3</sub>)  
 δ: 8.07 (s, 1H), 7.87 (d, *J* = 7.8 Hz, 2H), 7.78 (d, *J* = 7.8 Hz, 2H), 4.27 (q, *J* = 7.1 Hz, 2H),  
 1.29 (t, *J* = 7.1 Hz, 3H). Yield 81% (The yield was calculated from <sup>1</sup>H NMR using  
 phenanthrene as a standard)]

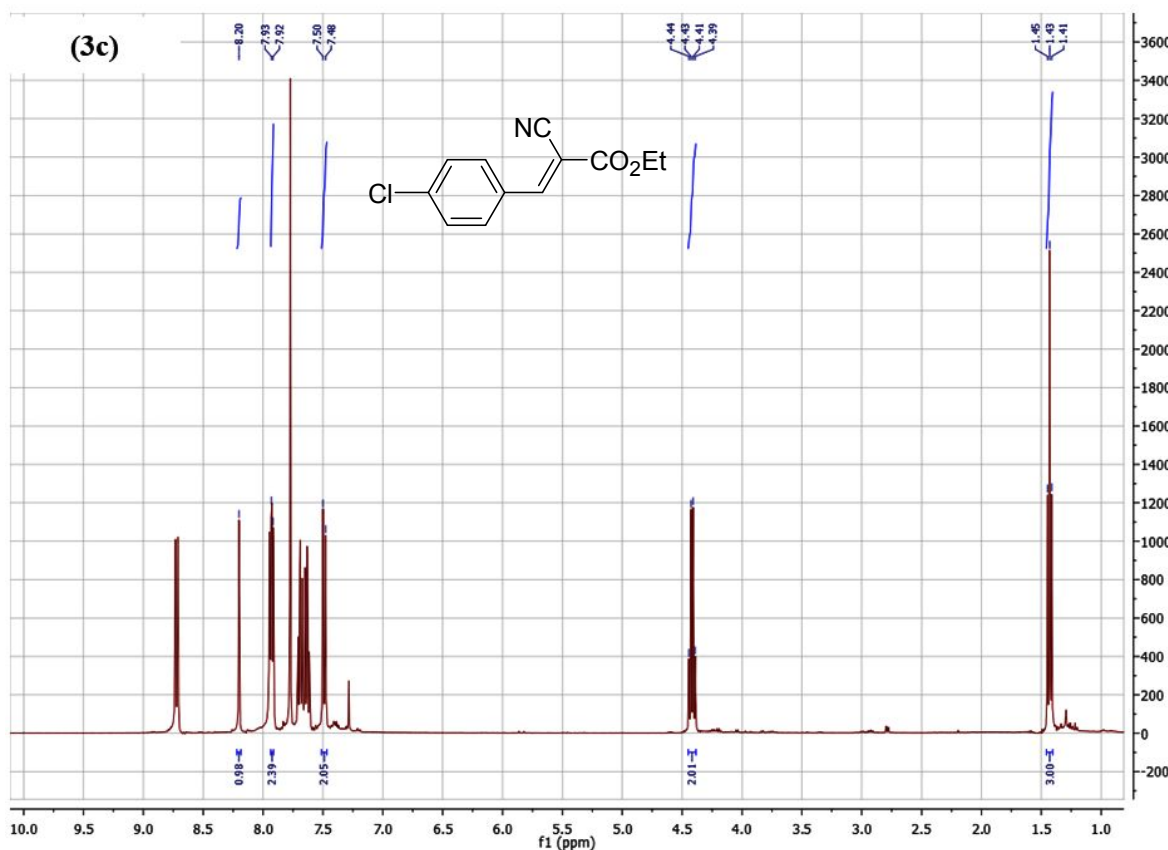

**Figure S5: <sup>1</sup>H NMR spectrum of 2-Cyano-3-(4-chloro-phenyl)-acrylic acid ethyl ester (3c) with standard phenanthrene**

[2- Cyano-3-(4-chloro-phenyl)-acrylic acid ethyl ester (3c).<sup>1</sup>H NMR (400 MHz, CDCl<sub>3</sub>)  
 $\delta$ : 8.20 (s, 1H), 7.93 (d,  $J$  = 8.0 Hz, 2H), 7.49 (d,  $J$  = 8.0 Hz, 2H), 4.42 (q,  $J$  = 7.1 Hz, 2H),  
 1.43 (t,  $J$  = 7.1 Hz, 3H). Yield 79% (The yield was calculated from <sup>1</sup>H NMR using  
 phenanthrene as a standard)]

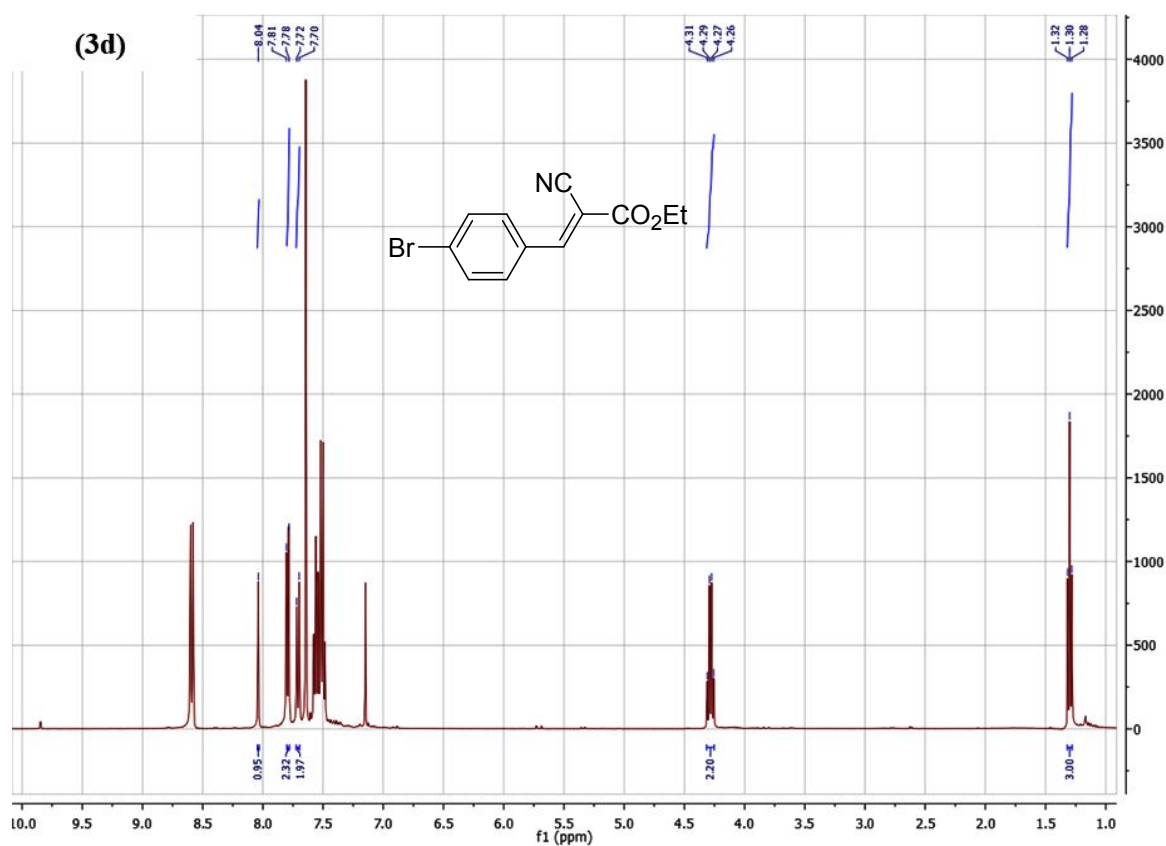

**Figure S6: <sup>1</sup>H NMR spectrum of 2-Cyano-3-(4-bromo-phenyl)-acrylic acid ethyl ester (3d) with standard phenanthrene**

[2-Cyano-3-(4-bromo-phenyl)-acrylic acid ethyl ester (3d). <sup>1</sup>H NMR (400 MHz, CDCl<sub>3</sub>)  
 $\delta$ : 8.04 (s, 1H), 7.79 (d,  $J = 8.0$  Hz, 2H), 7.71 (d,  $J = 8.0$  Hz, 2H), 4.28 (q,  $J = 7.1$  Hz, 2H),  
 1.30 (t,  $J = 7.1$  Hz, 3H). Yield 83% (The yield was calculated from <sup>1</sup>H NMR using  
 phenanthrene as a standard)]



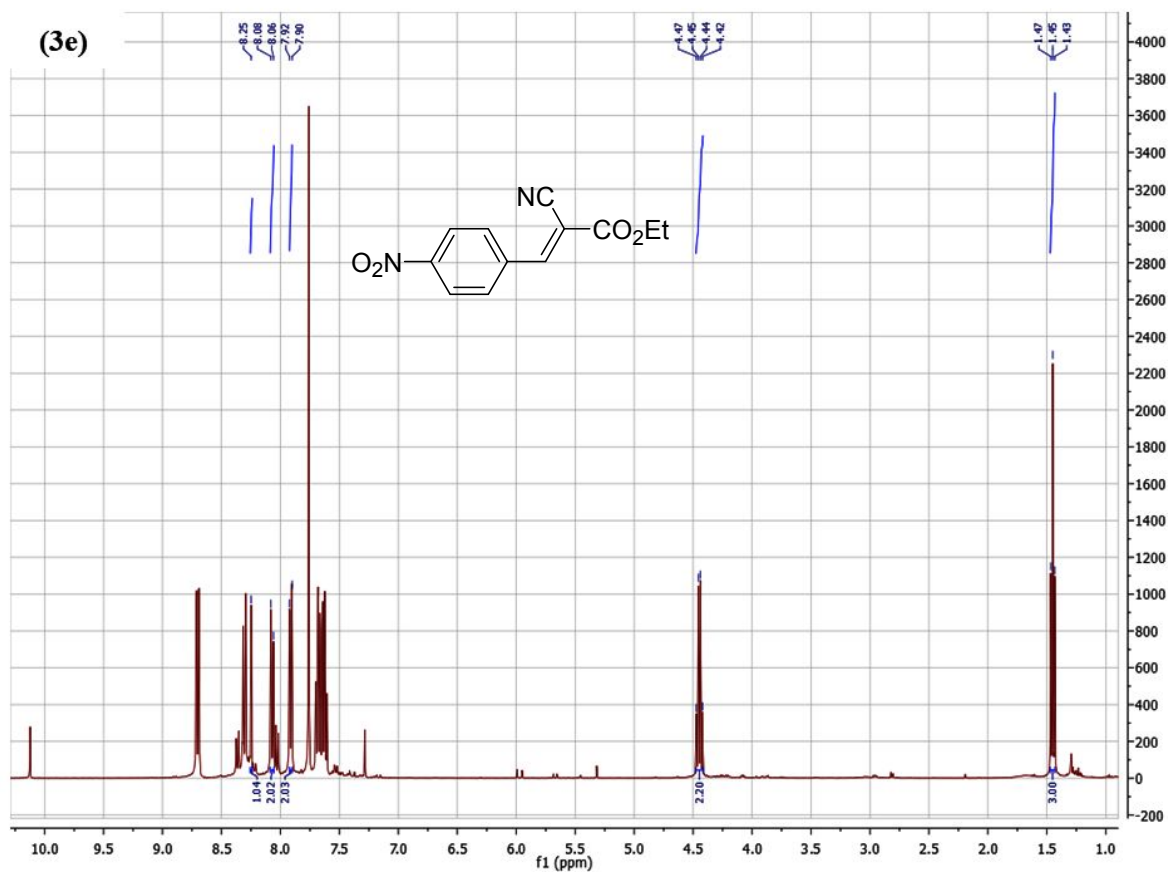

**Figure S7: <sup>1</sup>H NMR spectrum of 2-Cyano-3-(4-nitro-phenyl)-acrylic acid ethyl ester (3e) with standard phenanthrene**

[2-Cyano-3-(4-nitro-phenyl)-acrylic acid ethyl ester (3e).<sup>3</sup> <sup>1</sup>H NMR (400 MHz, CDCl<sub>3</sub>) δ: 8.25 (s, 1H), 8.07 (d, *J* = 8.0 Hz, 2H), 7.91 (d, *J* = 7.6 Hz, 2H), 4.45 (q, *J* = 7.1 Hz, 2H), 1.45 (t, *J* = 7.1 Hz, 3H). Yield 88% (The yield was calculated from <sup>1</sup>H NMR using phenanthrene as a standard)]

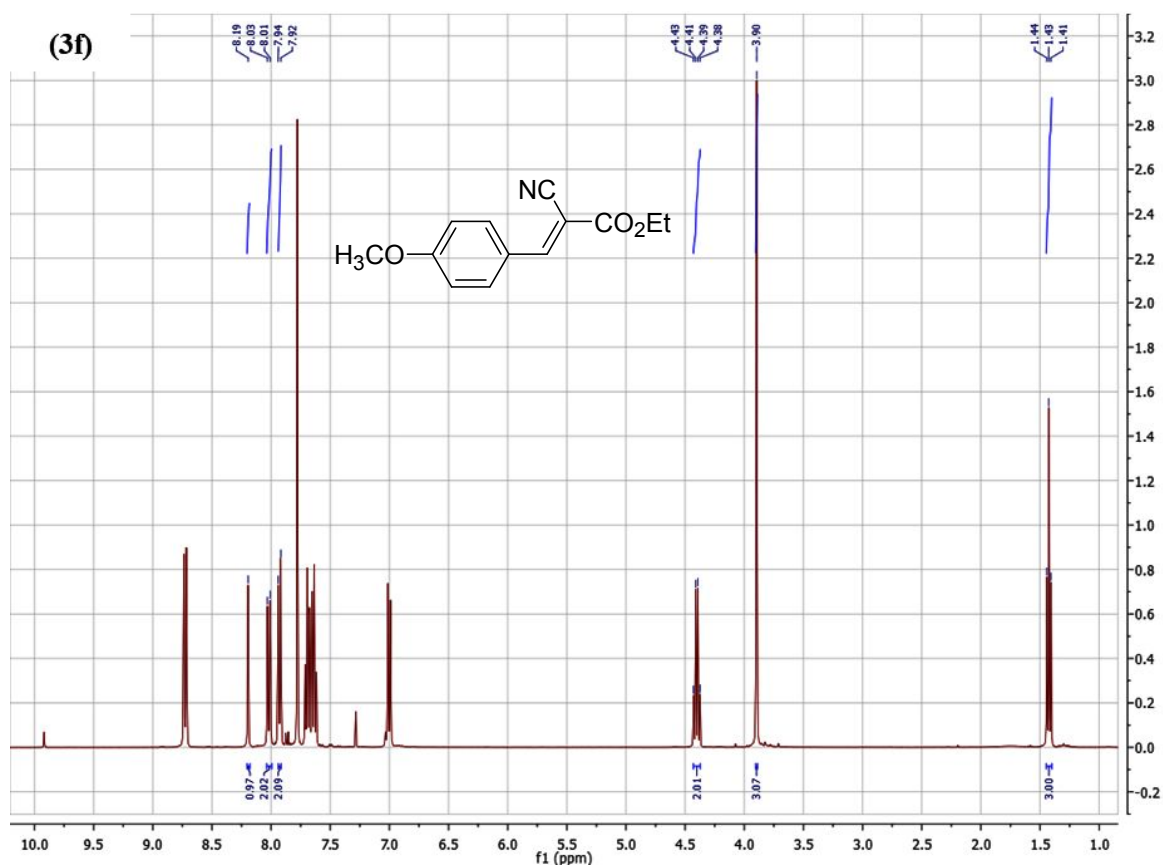

Figure S8: <sup>1</sup>H NMR spectrum of 2-Cyano-3-(4-methoxy-phenyl)-acrylic acid ethyl ester (3f) with standard phenanthrene

[2-Cyano-3-(4-methoxy-phenyl)-acrylic acid ethyl ester (3f).<sup>1</sup> <sup>1</sup>H NMR (400 MHz, CDCl<sub>3</sub>) δ: 8.19 (s, 1H), 8.02 (d, *J* = 8.0 Hz, 2H), 7.93 (d, *J* = 8 Hz, 2H), 4.40 (q, *J* = 7.1 Hz, 2H), 3.90 (s, 3H), 1.43 (t, *J* = 7.1 Hz, 3H). Yield 90% (The yield was calculated from <sup>1</sup>H NMR using phenanthrene as a standard)]

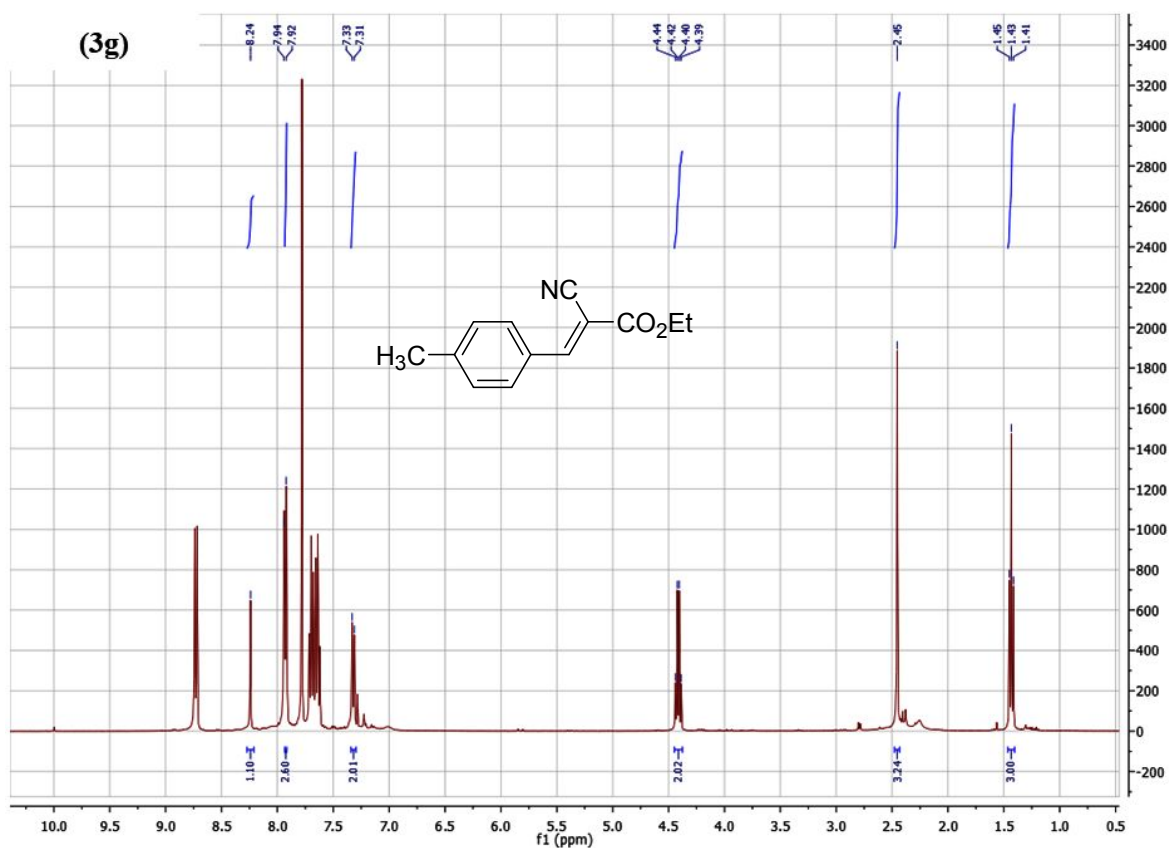

**Figure S9:**  $^1\text{H}$ NMR spectrum of 2-Cyano-3-p-tolyl-acrylic acid ethyl ester (3g) with standard phenanthrene

[2-Cyano-3-p-tolyl-acrylic acid ethyl ester (3g).<sup>1</sup>  $^1\text{H}$  NMR (400 MHz,  $\text{CDCl}_3$ )  $\delta$ : 8.24 (s, 1H), 7.93 (d,  $J = 8.0$  Hz, 2H), 7.32 (d,  $J = 8$  Hz, 2H), 4.41 (q,  $J = 8.0$  Hz, 2H), 2.45 (s, 3H), 1.43 (t,  $J = 8.0$  Hz, 3H). Yield 86% (The yield was calculated from  $^1\text{H}$ NMR using phenanthrene as a standard)]

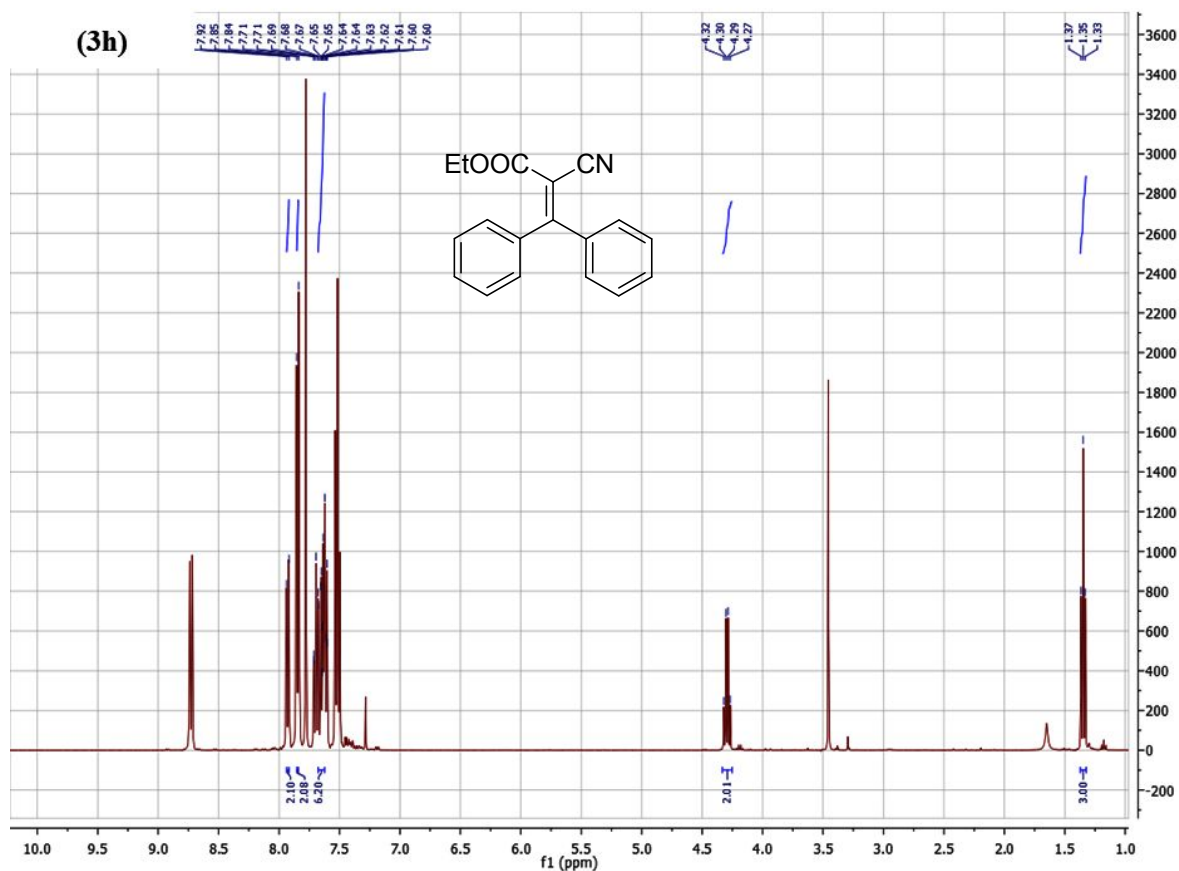

Figure S10:  $^1\text{H}$ NMR spectrum of 2-Cyano-3,3-diphenyl -acrylic acid ethyl ester (3h) with standard phenanthrene

[2-Cyano-3,3-diphenyl -acrylic acid ethyl ester (3h).<sup>4</sup>  $^1\text{H}$  NMR (400 MHz,  $\text{CDCl}_3$ )  $\delta$ : 7.93 (d,  $J = 8.0$  Hz, 2H), 7.84 (d,  $J = 8.0$ , 2H), 7.60-7.71 (m, 6H), 4.29 (q,  $J = 8.0$  Hz, 2H) and 1.35 (t,  $J = 8.0$  Hz, 3H). Yield 85% (The yield was calculated from  $^1\text{H}$ NMR using phenanthrene as a standard)]

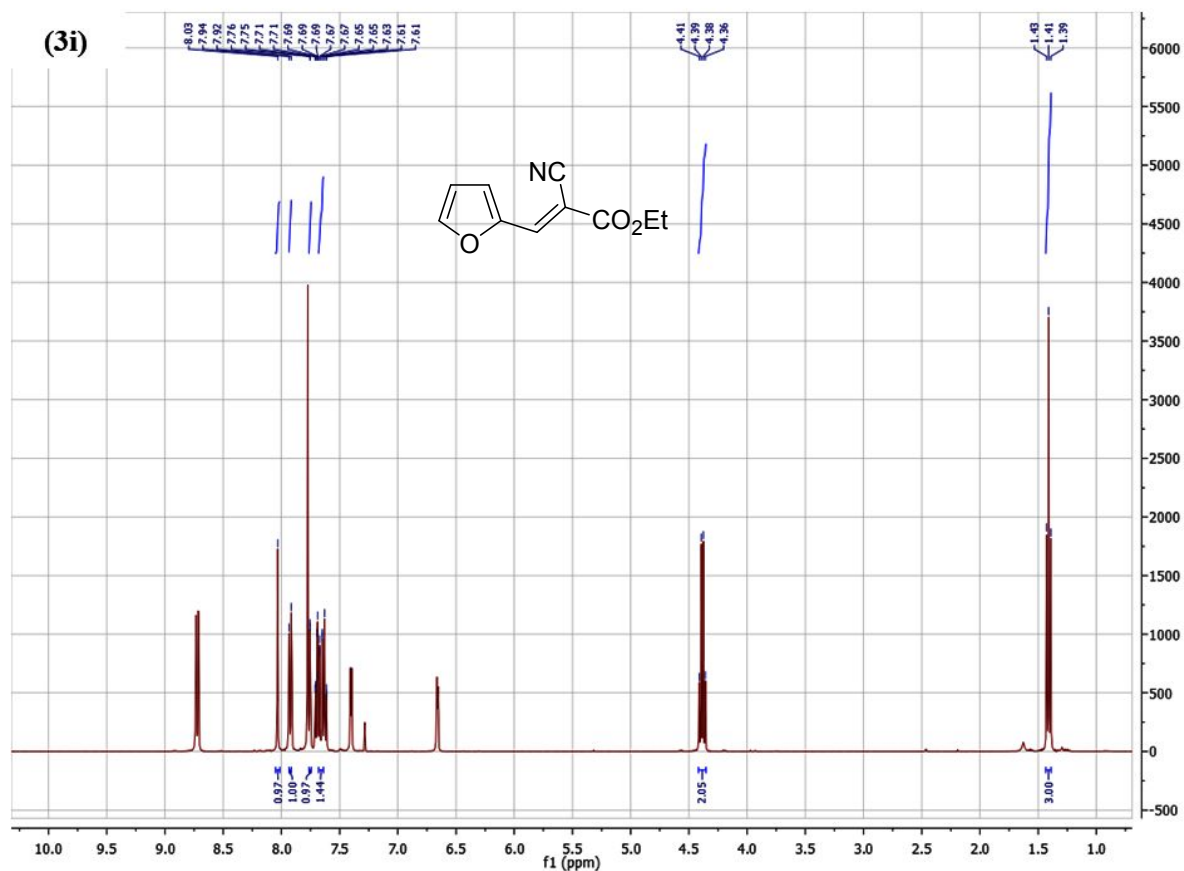

Figure S11:  $^1\text{H}$ NMR spectrum of 2-Cyano-3 furan-2-yl-acrylic acid ethyl ester (3i) with standard phenanthrene

[2-Cyano-3 furan-2-yl-acrylic acid ethyl ester (3i).<sup>5</sup>  $^1\text{H}$  NMR (400 MHz,  $\text{CDCl}_3$ )  $\delta$ : 8.03 (s, 1H), 7.92 (d,  $J = 8.0$  Hz, 1H), 7.76 (d,  $J = 8.0$  Hz, 1H), 7.66 (m, 1H), 4.39 (q,  $J = 8.0$  Hz, 2H) and 1.41 (t,  $J = 8.0$  Hz, 3H). Yield 84% (The yield was calculated from  $^1\text{H}$ NMR using phenanthrene as a standard)]

**Table S1. Element analysis and determination of Weight% and Atomic% of Y<sub>2</sub>ZnO<sub>4</sub>**

| Element      | Weight %   | Atomic %   |
|--------------|------------|------------|
| Yttrium      | 25.12      | 28.52      |
| Zinc         | 16.6       | 14.28      |
| Oxygen       | 58.28      | 57.20      |
| <b>Total</b> | <b>100</b> | <b>100</b> |

## Reference

1. Wan, J. P.; Jing, Y.; Liu, Y.; Sheng, S. Metal-free synthesis of cyano acrylates via cyanuric chloride-mediated three-component reactions involving a cascade consists of Knoevenagel condensation/cyano hydration/esterification. *RSC Adv.* **2014**, *4*, 63997-64000.
2. Shen, Y.; Yang, B. Synthesis of  $\alpha$ ,  $\beta$ -Unsaturated Cyanoesters Promoted by Tri-N-Butylarsine. *Synth. Commun.* **1989**, *19*, 3069-3075.
3. Cabello, J. A.; Campelo, J. M.; Garcia, A.; Luna, D.; Marinas, J. M. Knoevenagel condensation in the heterogeneous phase using aluminum phosphate-aluminum oxide as a new catalyst. *J. Org. Chem.* **1984**, *49*, 5195-5197.
4. Gholap, A. R.; Paul, V.; Srinivasan, K. V. Novel Process for the Synthesis of Class I Antiarrhythmic Agent ( $\pm$ )-Cibenzoline and Its Analogs. *Synth. Commun.* **2008**, *38*, 2967-2982.
5. Khan, R. H.; Mathur, R. K.; Ghosh, A. C. Tellurium (IV) tetrachloride catalysed facile Knoevenagel reaction. *Synth. Commun.* **1996**, *26*, 683-686.
